# Supplementary material for: Chronic Rhinosinusitis—Microbiological Etiology, Potential Genetic Markers, and Diagnosis
Source: MDPI journal article supplement (doi:10.3390/ijms25063201), 2024-03-11
Supplement: s1 [file s1]

## Supplementary materials

# Chronic Rhinosinusitis—Microbiological Etiology, Potential Genetic Markers, and Diagnosis

Michał Michalik <sup>1,†</sup> and Beata Krawczyk <sup>2,\*,†</sup>

<sup>1</sup> Medical Center MML, Bagno 2, 00-112 Warsaw, Poland; m.michalik@mml.com.pl

<sup>2</sup> Department of Biotechnology and Microbiology, Faculty of Chemistry, Gdańsk University of Technology, G. Narutowicza 11/12, 80-233 Gdańsk, Poland

\* Correspondence: beata.krawczyk@pg.edu.pl

† These authors contributed equally to this work.

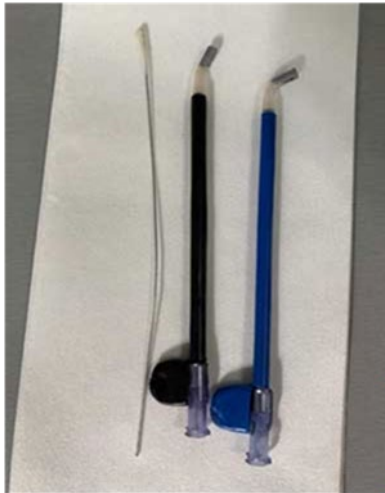

Figure S1. Three cannulas with different angles, contoured at 15, 45 and 120 degrees, respectively for collecting microbiological samples of high-diagnostic specimens from diseased paranasal sinuses.

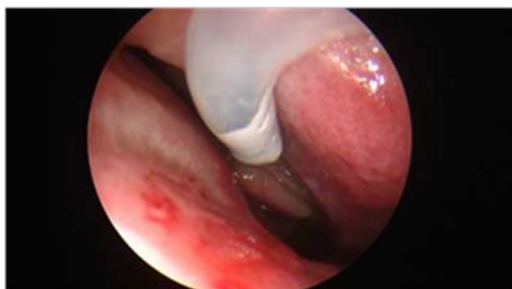

Figure S2. Use of an angled cannula during the procedure of collecting microbiological samples.
